# Supplementary material for: Developing and Piloting a Novel Ranking System to Assess Popular Dietary Patterns and Healthy Eating Principles
Source: MDPI journal article supplement (doi:10.3390/nu14163414), 2022-08-19
Supplement: s1 [file s1]

# **Developing and piloting a novel ranking system to assess popular dietary patterns and healthy eating principles**

**Ella L Bracci <sup>1\*</sup>, Rachel Milte<sup>2</sup>, Jennifer B Keogh <sup>1</sup> and Karen J Murphy<sup>1</sup>**

Supplementary information

**Table S1:** Nutrition Profile of diets

**Table S2:** Ranking System Outline & Categories

**Table S1.** Summary of nutrition profile of popular weight loss diets and healthy eating principles

| Nutrients               | Keto | Paleo | IF   | 8WW  | Optifast | MedDiet WL | AGHE WL |
|-------------------------|------|-------|------|------|----------|------------|---------|
| Energy (avMJ/day)       | 8.9  | 6.7   | 6.5  | 7.3  | 5.0      | 6.9        | 6.1     |
| %en from protein        | 22   | 23    | 24   | 56   | 26       | 20         | 20      |
| %en from CHO            | 6    | 23    | 36   | 11   | 48       | 31         | 47      |
| %en from Fat            | 70   | 51    | 35   | 29   | 19       | 40         | 28      |
| %en MUFA                | 27   | 26    | 16   | 10   | 9        | 22         | 12      |
| %en PUFA                | 10   | 7     | 6    | 3    | 3        | 8          | 5       |
| %en SFA                 | 29   | 18    | 10   | 11   | 4        | 8          | 9       |
| %en alcohol             | nil  | 0.1   | 0.1  | nil  | 0.6      | 4.0        | 0.3     |
| Fibre (g/day)           | 20   | 25    | 34   | 21   | 43       | 29         | 27      |
| Vit C (mg/day)          | 90   | 242   | 166  | 193  | 630      | 215        | 135     |
| Vit E(mg/day)           | 29   | 26    | 15   | 14   | 21       | 23         | 11      |
| Vit A (µg/day)          | 831  | 1363  | 983  | 992  | 2095     | 1005       | 1246    |
| Folate (µg/day)         | 355  | 283   | 446  | 483  | 943      | 451        | 555     |
| VitB12 (µg/day)         | 5.4  | 3.0   | 4.0  | 15   | 3.0      | 3.4        | 3.9     |
| Vit B1 (mg/day)         | 1.0  | 0.8   | 1.2  | 0.9  | 2.0      | 1.1        | 1.0     |
| Niacin (mg/day)         | 50   | 40    | 34   | 111  | 40       | 35         | 30      |
| Magnesium (mg/day)      | 398  | 350   | 446  | 448  | 451      | 339        | 355     |
| Iodine (µg/day)         | 98   | 54    | 142  | 123  | 138      | 112        | 152     |
| Phosphorous<br>(mg/day) | 1926 | 1242  | 1672 | 2647 | 1457     | 1350       | 1299    |
| Selenium (µg/day)       | 103  | 78.9  | 86.1 | 228  | 69.9     | 71.9       | 75.5    |
| Sodium (mg/day)         | 2922 | 1820  | 3272 | 1786 | 3903     | 1214       | 1727    |
| Potassium (mg/day)      | 2802 | 3310  | 3730 | 5261 | 5776     | 3716       | 3059    |
| Calcium (mg/day)        | 1249 | 366   | 1368 | 898  | 1203     | 782        | 953     |
| Iron (mg/day)           | 12   | 11    | 12   | 16   | 19       | 11         | 8.7     |
| Zinc                    | 13   | 11    | 10   | 24   | 13       | 9.7        | 9.1     |

| <b>Serves/Day</b>  |     |     |     |     |     |     |     |
|--------------------|-----|-----|-----|-----|-----|-----|-----|
| Fruit              | 0.2 | 1.4 | 0.9 | 0.2 | 2.3 | 1.0 | 2.0 |
| Vegetables         | 2.5 | 5.9 | 5.9 | 6.5 | 12  | 8.3 | 4.2 |
| Breads and cereals | 0.5 | 0.8 | 4.5 | 0.4 | 0.7 | 3.2 | 4.8 |
| Dairy foods        | 2.3 | nil | 2.8 | 1.9 | 1.2 | 1.3 | 0.9 |
| Meat/meat alt.     | 6.1 | 5.0 | 2.4 | 9.1 | 0.6 | 2.8 | 2.0 |
| Discretionary      | 3.3 | 2.1 | 1.1 | 0.1 | 0,3 | 1.3 | 0.9 |

CHO= carbohydrate, PRO= protein, %en = percentage of energy, MUFA= monounsaturated fat,

PUFA= polyunsaturated fat, SFA= saturated fat, IF= intermittent fasting, 8WW = 8 Weeks to Wow

**Table S2** Ranking System Outline & Categories

| Category: Dietary Quality                                      | Score<br>(points) | Comments |
|----------------------------------------------------------------|-------------------|----------|
| i.Meal plan/diet Accounts for gender?                          |                   |          |
| Yes                                                            | 10                |          |
| No                                                             | 0                 |          |
| Food Groups & Serve Sizes (based on Foodworks data – averages) |                   |          |
| a) Fruit intake                                                |                   |          |
| 0 serves/day                                                   | 0                 |          |
| 1 serve/day                                                    | 10                |          |
| 2 serves/day (100%)                                            | 20                |          |
| b) Vegetable intake                                            |                   |          |
| 0 serves/day                                                   | 0                 |          |
| 1 serve/day                                                    | 10                |          |
| 2 serves/day                                                   | 20                |          |
| 3 serves/day                                                   | 30                |          |
| 4 serves/day                                                   | 40                |          |
| 5 serves/day (100% F)                                          | 50                |          |
| 6 serves/day (100% M)                                          | 50                |          |
| c) Dairy & alternatives*                                       |                   |          |

|                                                                 |         |                                   |
|-----------------------------------------------------------------|---------|-----------------------------------|
| 0 serves/day                                                    | 0       |                                   |
| 1 serve/day                                                     | 10      |                                   |
| 2 serves/day (100% F)                                           | 20      |                                   |
| 2.5 serves/day (100% M)                                         | 20      |                                   |
| d) Breads, cereals & grains                                     |         |                                   |
| 0 serves/day                                                    | 0       |                                   |
| 1 serve/day                                                     | 10      |                                   |
| 2 serves/day                                                    | 20      |                                   |
| 3 serves/day (50%)                                              | 30      |                                   |
| 4 serves/day                                                    | 40      |                                   |
| 5 serves/day                                                    | 50      |                                   |
| 6 serves/day (100% F + M)                                       | 60      |                                   |
| e) Lean meats, poultry & alternatives*                          |         |                                   |
| 0 serves                                                        | 0       |                                   |
| 1 serve/day                                                     | 10      |                                   |
| 2 serves/day                                                    | 20      |                                   |
| 2.5 serves/day (100% F)                                         | 30      |                                   |
| 3 serves/day (100% M)                                           | 30      |                                   |
| f) Discretionary                                                |         | Manual calculation from Foodworks |
| <2.5 (F)                                                        | 10      |                                   |
| <3 (M)                                                          | 10      |                                   |
| >3                                                              | 0       |                                   |
| i. AMDR Range – in the range Y/N?                               |         |                                   |
| CHO (45-65%)                                                    | 0 to 10 |                                   |
| FAT (20-35%)                                                    | 0 to 10 |                                   |
| PRO (15-25%)                                                    | 0 to 10 |                                   |
| Alcohol (as a beverage)                                         |         |                                   |
| >20g (2x standard drinks)                                       | -10     |                                   |
| <20g                                                            | 0       |                                   |
| “Disease prevention”                                            |         |                                   |
| g) Limit saturated fat intake<br>(McNaughton) Cholesterol & CHD |         |                                   |

|                                                                                                                                                            |                                                                      |                                                                          |                                                                        |
|------------------------------------------------------------------------------------------------------------------------------------------------------------|----------------------------------------------------------------------|--------------------------------------------------------------------------|------------------------------------------------------------------------|
| <div>&lt;10% energy</div>                                                                                                                                  | 10                                                                   |                                                                          |                                                                        |
| <div>10%</div>                                                                                                                                             | 0                                                                    |                                                                          |                                                                        |
| <div>&gt;10% energy</div>                                                                                                                                  | -10                                                                  |                                                                          |                                                                        |
| <div>h) Choose foods low in salt<br/>(McNaughton) Hypertension</div> <div>&lt;1000mg (AI)</div> <div>&lt;2000mg (SDT)</div> <div>&gt;2000mg</div>          | <div>20</div> <div>10</div> <div>-10</div>                           | <div>SDT 2,000mg/day</div>                                               |                                                                        |
| <div>Micronutrients* based on 19-50 y/o</div>                                                                                                              |                                                                      |                                                                          |                                                                        |
| <div>Fibre</div> <div>Meets Male AI (30g) (100%)</div> <div>Meets Female AI (25g) (100%)</div> <div>&lt;AI</div>                                           | <div>20</div> <div>20</div> <div>0</div>                             | <div>Males 30g/day Females 25g/day</div>                                 |                                                                        |
| <div>Minerals &amp; Trace elements 19-50y/o</div>                                                                                                          |                                                                      |                                                                          |                                                                        |
| <div>Calcium</div> <div>Meets RDI (100%)</div> <div>Meets EAR (100%)</div> <div>&lt;EAR</div>                                                              | <div>20</div> <div>10</div> <div>0</div>                             | <div>RDI</div> <div>Males 1000mg/day</div> <div>Females 1000mg/day</div> | <div>EAR</div> <div>Males 840mg/day</div> <div>Females 840mg/day</div> |
| <div>Iron</div> <div>Meets RDI (100%) M</div> <div>Meets RDI (100%) F</div> <div>Meets EAR (100%) M</div> <div>Meets EAR (100%) F</div> <div>&lt;EAR</div> | <div>20</div> <div>20</div> <div>10</div> <div>10</div> <div>0</div> | <div>RDI</div> <div>Males 8mg/day</div> <div>Females 18mg/day</div>      | <div>EAR</div> <div>Males 6mg/day</div> <div>Females 8mg/day</div>     |
| <div>Thiamine</div> <div>Meets RDI (100%)</div> <div>Meets EAR (100%)</div> <div>&lt;EAR</div>                                                             | <div>20</div> <div>10</div> <div>0</div>                             | <div>RDI</div> <div>Males 1.2mg/day</div> <div>Females 1.1mg/day</div>   | <div>EAR</div> <div>Males 1.0mg/day</div> <div>Females 0.9mg/day</div> |
| <div>Zinc</div> <div>Meets RDI (100%)</div> <div>Meets EAR (100%)</div> <div>&lt;EAR</div>                                                                 | <div>20</div> <div>10</div> <div>0</div>                             | <div>RDI</div> <div>Males 14mg/day</div> <div>Females 8mg/day</div>      | <div>EAR</div> <div>Males 12mg/day</div> <div>Females 6.5mg/day</div>  |
| <div>Iodine</div> <div>Meets RDI (100%)</div> <div>Meets EAR (100%)</div>                                                                                  | <div>20</div> <div>10</div>                                          | <div>RDI</div> <div>Males 150ug/day</div> <div>Females 150ug/Day</div>   | <div>EAR</div> <div>Males 100ug/day</div> <div>Females 100ug/day</div> |

|                               |    |                     |                   |
|-------------------------------|----|---------------------|-------------------|
| <EAR                          | 0  |                     |                   |
| Magnesium                     |    | RDI                 | EAR               |
| Meets RDI (100%)              | 20 | Males 420mg/day     | Males 350mg/day   |
| Meets EAR (100%)              | 10 | Females320mg/day    | Females 265mg/day |
| <EAR                          | 0  |                     |                   |
| Phosphorus                    |    | RDI                 | EAR               |
| Meets RDI (100%)              | 20 | Males 1,000mg       | Males 580 mg/day  |
| Meets EAR (100%)              | 10 | Females 1000mg      | Females 580mg/day |
| <EAR                          | 0  |                     |                   |
| Selenium                      |    | RDI                 | EAR               |
| Meets RDI (100%)              | 20 | Males 70ug/day      | Males 60ug/day    |
| Meets EAR (100%)              | 10 | Females 60mg/day    | Females 50ug/day  |
| <EAR                          | 0  |                     |                   |
| Potassium                     |    | AI                  |                   |
| Meets AI (100%)               | 20 | Males 3,800mg/day   |                   |
| <AI                           | 0  | Females 2,800mg/day |                   |
| Vitamins                      |    |                     |                   |
| Vitamin B12                   |    | RDI                 | EAR               |
| Meets RDI (100%)              | 20 | Males 2.4ug/day     | Males 2.0ug/day   |
| Meets EAR (100%)              | 10 | Females 2.4ug/day   | Females 2.0ug/day |
| <EAR                          | 0  |                     |                   |
| Vitamin C                     |    | RDI                 | EAR               |
| Meets RDI (100%)              | 20 | Males 45mg/day      | Males 30mg/day    |
| Meets EAR (100%)              | 10 | Females 45mg/day    | Females 30mg/day  |
| <EAR                          | 0  |                     |                   |
| Vitamin E *a-tocopherol equiv |    | AI                  |                   |
| Meets AI (100%)               | 20 | Males 10mg/day      |                   |
| <AI                           | 0  | Females 7mg/day     |                   |
| Folate *DFE                   |    | RDI                 | EAR               |
| Meets RDI (100%)              | 20 | Males 400ug/day     | Males 320ug/day   |
| Meets EAR (100%)              | 10 | Females 400ug/day   | Females 320ug/day |
| <EAR                          | 0  |                     |                   |
| Riboflavin                    |    | RDI                 | EAR               |
| Meets RDI (100%)              | 20 | Males 1.3mg/day     | Males 1.1mg/day   |
| Meets EAR (100%)              | 10 | Females 1.1mg/day   | Females 0.9mg/day |

|                                                                                   |       |                   |                   |
|-----------------------------------------------------------------------------------|-------|-------------------|-------------------|
| <EAR                                                                              | 0     |                   |                   |
| Niacin *NE                                                                        |       | RDI               | EAR               |
| Meets RDI (100%)                                                                  | 20    | Males 16mg/day    | Males 12mg/day    |
| Meets EAR (100%)                                                                  | 10    | Females 14mg/day  | Females 11mg/day  |
| <EAR                                                                              | 0     |                   |                   |
| Vitamin A                                                                         |       | RDI               | EAR               |
| Meets RDI (100%)                                                                  | 20    | Males 900ug/day   | Males 625ug/day   |
| Meets EAR (100%)                                                                  | 10    | Females 700ug/day | Females 500ug/day |
| <EAR                                                                              | 0     |                   |                   |
|                                                                                   |       |                   |                   |
| Category –<br>Behaviour Change & Sustainability long-term                         | Score | Comments          |                   |
| Support & resources<br>i.e. website, group forum                                  | 5     |                   |                   |
| Meal plan                                                                         | 5     |                   |                   |
| Strategies/help when eating out,<br>bored/comfort eating                          | 5     |                   |                   |
| Encourage self-monitoring (counting,<br>recording)                                | 5     |                   |                   |
| Teaches healthy food principles i.e. label<br>and package reading (self-efficacy) | 5     |                   |                   |
| Promote weight cycling – i.e 8 WW<br>Promoted for the short term                  | - 5   |                   |                   |
| Does the diet have restrictions i.e. food<br>groups, foods                        | -5    |                   |                   |
|                                                                                   |       |                   |                   |
| Category – Negative effects                                                       | Score | Comments          |                   |

|                                               |       |                           |
|-----------------------------------------------|-------|---------------------------|
| Headache                                      | -10   | Negative cumulative score |
| Nausea                                        | -10   |                           |
| Lethargy                                      | -10   |                           |
| Dizziness                                     | -10   |                           |
| Diarrhea/constipation                         | -10   |                           |
|                                               |       |                           |
| Category- Cost of diet                        | Score | Comments                  |
| Food Insecurity<br>(average income = \$1,659) |       |                           |
| <30% of average income                        | 10    |                           |
| >30% of average income                        | -10   |                           |
